# Supplementary material for: Amorphous boron nanorod as an anode material for lithium-ion batteries at room temperature
Source: Royal Society of Chemistry journal article supplement (doi:10.1039/c7nr03017g), 2017-01-01
Supplement: c7nr03017g1.pdf [file c7nr03017g1.pdf]

## Supporting Information

### **Amorphous Boron Nanorods as Anode Material for Lithium Ion Batteries at Room Temperature**

Changjian Deng,<sup>a</sup> Miu Lun Lau,<sup>a</sup> Heather Barkholtz,<sup>b</sup> Haiping Xu,<sup>b</sup> Meiyue Olivia Xu,<sup>b</sup> Tao Xu,<sup>b</sup> Yuzi Liu,<sup>c</sup>

Hao Wang,<sup>d</sup> Justin G. Connell,<sup>e</sup> Riley Parrish,<sup>a</sup> Kassiopeia A. Smith,<sup>a</sup> Hui Xiong<sup>\*a</sup>

a. Micron School of Materials Science and Engineering, Boise State University, Boise, ID 83725, USA.

b. Department of Chemistry and Biochemistry, Northern Illinois University, DeKalb, IL 60115, USA.

c. Center for Nanoscale Materials, Argonne National Laboratory, Lemont, IL, 60439, USA.

d. Chemical Science and Engineering Division, Argonne National Laboratory, Lemont, IL, 60439, USA

e. Joint Center for Energy Storage Research, Argonne National Laboratory, Lemont, IL, 60439, USA

\*Corresponding Author. Email: [clairexiong@boisestate.edu](mailto:clairexiong@boisestate.edu)

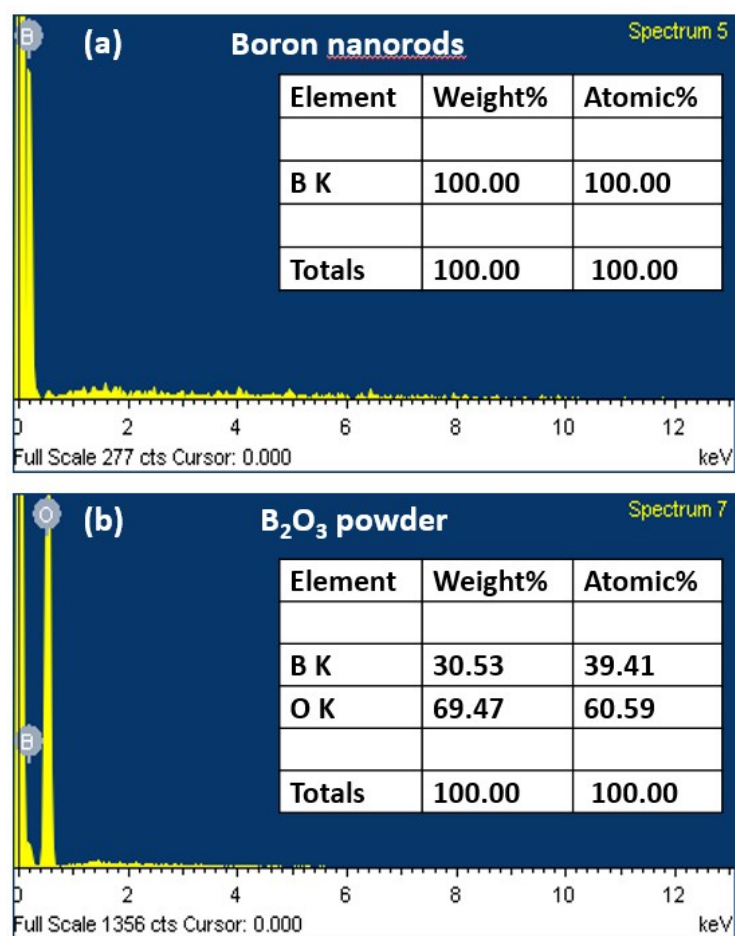

**Figure S1:** EDS of (a) as-prepared boron nanorods and (b) raw B<sub>2</sub>O<sub>3</sub> powders.

The diffusion coefficient can be expressed as the following equation<sup>1</sup>:

$$D_{Li+} = \frac{\pi(m_B V_M)^2}{4(M_B S)^2} \left( \frac{\Delta E_S}{\tau \left( \frac{dE_t}{d\sqrt{\tau}} \right)} \right)^2, \tau \ll \frac{L^2}{D_{Li+}} \quad (1)$$

where  $m_B$ ,  $V_M$ ,  $M_B$ ,  $S$  and  $\tau$  are mass, molecular volume, molecular weight, active surface area and current pulse time of the electrode. If  $E$  versus  $\sqrt{\tau}$  shows a linear behavior during the current pulse (Figure S1), the equation can be transformed into:

$$D_{Li+} = \frac{\pi}{4\tau} \left( \frac{m_B V_M}{M_B S} \right)^2 \left( \frac{\Delta E_S}{\Delta E_t} \right)^2, \tau \ll \frac{L^2}{D_{Li+}} \quad (2)$$

Where  $\Delta E_S$  and  $\Delta E_t$  for each titration are illustrated in Figure S2.

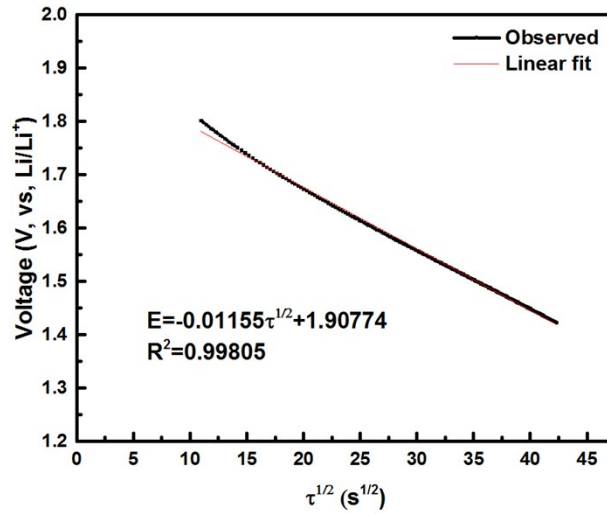

Figure S2: Linear behavior of the E vs  $\tau^{1/2}$  relationship.

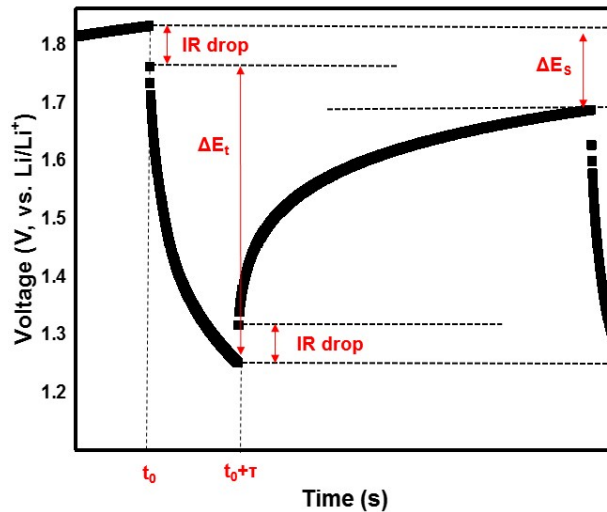

Figure S3: Schematic of GITT technique.

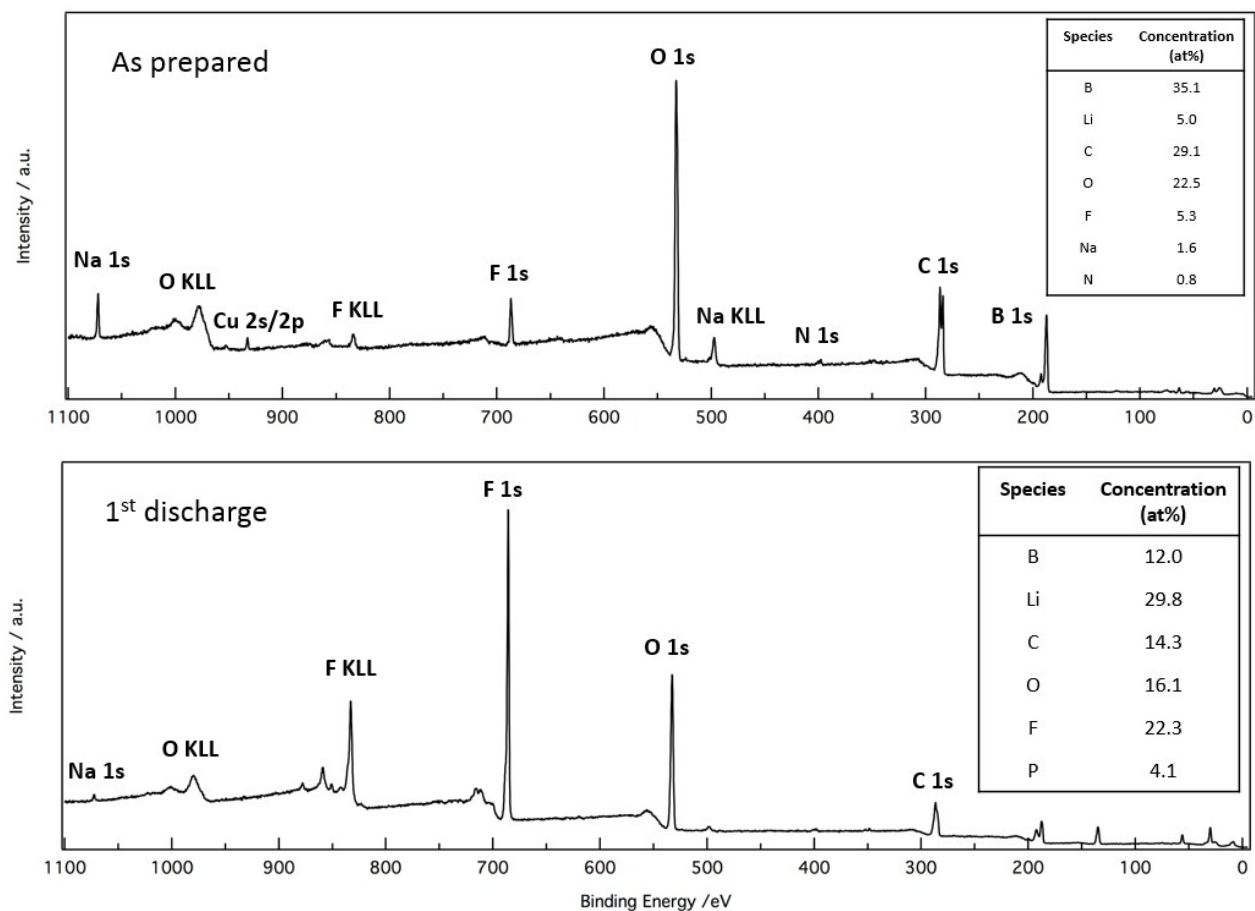

**Figure S4:** *Ex situ* XPS service scans of as prepared and 1<sup>st</sup> discharged boron materials

## Notes and references

- (1) Rui, X. H.; Ding, N.; Liu, J.; Li, C.; Chen, C. H.: Analysis of the chemical diffusion coefficient of lithium ions in  $\text{Li}_3\text{V}_2(\text{PO}_4)_3$  cathode material. *Electrochim Acta* **2010**, 55, 2384-2390.
